# Supplementary material for: “Y no quedó nada, nada de la casa, todo salió volando” (And there was nothing left, nothing of the house, everything flew away): a critical medical ecological perspective on the lived experience of hurricane María in Puerto Rico
Source: Springer Nature journal article supplement (doi:10.1186/s12889-021-11847-w), 2021-10-09
Supplement: MOESM1 [file 19743024]

| Child code                                                                                     | Grandchild code        | Description                                                                                                                                                                                                                                                                                                                              |
|------------------------------------------------------------------------------------------------|------------------------|------------------------------------------------------------------------------------------------------------------------------------------------------------------------------------------------------------------------------------------------------------------------------------------------------------------------------------------|
| <b>1. Comunidad</b>                                                                            |                        |                                                                                                                                                                                                                                                                                                                                          |
| 1.a Positivo                                                                                   | 1.a1.Unión comunitaria | Participantes describen a su comunidad como una unida.                                                                                                                                                                                                                                                                                   |
|                                                                                                | 1.b2 Tranquilidad      | Participantes describen su comunidad como una tranquila.                                                                                                                                                                                                                                                                                 |
| 1.b Negativo                                                                                   | 1.b1 Job Security      | Participantes describen las dificultades de conseguir trabajo en la comunidad.                                                                                                                                                                                                                                                           |
|                                                                                                |                        |                                                                                                                                                                                                                                                                                                                                          |
| <b>2. Situación Sociales</b>                                                                   |                        | La crisis económica, la situación fiscal y social.                                                                                                                                                                                                                                                                                       |
| 2.a Crímenes/violencia                                                                         |                        | Algunas personas reportan que estaban cansados de la criminalidad<br>-“ya la situación de la criminalidad nos estaba incomodando.”                                                                                                                                                                                                       |
|                                                                                                |                        |                                                                                                                                                                                                                                                                                                                                          |
| 2.b Falta de empleo                                                                            |                        | La situación económica en PR afectaba el ámbito laboral en los individuos.                                                                                                                                                                                                                                                               |
| 2.c Muchas personas se estaban yendo de la Isla                                                |                        | Se habla de la cantidad de personas que se han ido de la isla debido a la dificultad económica.                                                                                                                                                                                                                                          |
| <b>3. Preparación para el huracán</b>                                                          |                        | Participantes relatan como se prepararon para el huracán                                                                                                                                                                                                                                                                                 |
| 3.a Utilizar la preparación de Irma para el Huracán María                                      |                        | Participantes reportaron usar los productos comprados para Irma.<br>Otros reportaron que habían dejado las tormenteras puestas desde Irma.                                                                                                                                                                                               |
|                                                                                                |                        |                                                                                                                                                                                                                                                                                                                                          |
| 3.b Agua, comida enlatada para varios días o semanas.                                          |                        | La preparación consistió en comprar agua, comida enlatada, baterías que durara hasta dos semanas.                                                                                                                                                                                                                                        |
| 3.c Cubrir las ventanas y puertas con tormenteras/paneles                                      |                        | Participantes reportar que en sus preparativos incluyo cubrir las ventanas y puertas del hogar.                                                                                                                                                                                                                                          |
| 3.d Personas acudieron a refugios o la casa de algún familiar                                  |                        | Participantes reportaron que decidieron irse a otro lugar porque no encontraba su hogar seguro.                                                                                                                                                                                                                                          |
| <b>4. Falta de preparación ante la llegada del huracán</b>                                     |                        | Hubo un consenso entre participantes donde mencionaron la falta de preparación para eventos catastróficos.                                                                                                                                                                                                                               |
| 4.a falta de prevención y mantenimiento de parte de las agencias gubernamentales               |                        | Existía una falta de mantenimiento por parte de los municipios y el gob estatal. Ya sea en el recogido de escombros, basura, el tendido eléctrico, alcantarillas y carreteras                                                                                                                                                            |
| 4.b Putting “preparation” on people who don’t have the resources and are already struggling    |                        | Participantes reportaron que era difícil prepararse para el huracán con la situación económica. “No todo el mundo podía cubrir los gastos”                                                                                                                                                                                               |
| <b>5. Sense of invincibility – nothing will happen to us</b>                                   |                        | La sobre confianza que existía en la comunidad porque no habían ocurrido eventos similares en mucho tiempo                                                                                                                                                                                                                               |
| 5.a El efecto de sobreconfianza magnificado por Irma                                           |                        | Los participantes relatan que la seguridad de que el huracán María no iba a tocar PR se magnifico con el huracán Irma.                                                                                                                                                                                                                   |
| 5.b “El cuento del lobo”                                                                       |                        | Referencia a que se decían que venían los huracanes y nunca llegaban.<br>Es parte de la sobreconfianza<br><br>Participantes relatan que su poca preparación se debió a que no creían que el huracán iba a llegar. “ay, yo no voy a comprar nada, para que hacer tanta fila si eso no viene, a última hora dicen que eso se va a desviar” |
| <b>6. Underestimated what was coming/ didn’t expect or anticipate the level of destruction</b> |                        | “Nadie esperaba el impacto ni el nivel de destrucción” Participantes relatan que era imposible prepararse para la magnitud de el evento.                                                                                                                                                                                                 |
| <b>7. Initial hit of Irma made the destruction of María worse</b>                              |                        | Algunos participantes reportaron que los daños ocurridos por el huracán Irma (i.e. falta de luz) agravaron la situación ante María.                                                                                                                                                                                                      |
| <b>8. Aferrarse a la Fé- como herramienta para que no pasara nada</b>                          |                        | El uso de la religión (fe) como herramienta para creer que el huracán no llegaría.<br>“Dios nos va a proteger”                                                                                                                                                                                                                           |
| 8.a “Puerto Rico es una isla bendecida”                                                        |                        | Las personas utilizaban este decir para hablar sobre como estaríamos bien y que no nos iba a pasar nada.                                                                                                                                                                                                                                 |
|                                                                                                |                        |                                                                                                                                                                                                                                                                                                                                          |
| <b>9. Relatos/Experiencia</b>                                                                  |                        | Experiencias vividas durante el huracán                                                                                                                                                                                                                                                                                                  |
| 9.a Relatos sobre el viento                                                                    |                        | e.g. “Era un monstruo, el ruido del huracán era un monstruo.”<br>“El viento retumbaba la casa”                                                                                                                                                                                                                                           |
| 9.b Relatos de experiencias (en general) durante el huracán                                    |                        | Participantes relatan sus experiencias durante el huracán. Que hicieron, como la pasaron, y si problemas que enfrentaron.                                                                                                                                                                                                                |
| <b>10. Miedo y ansiedad durante el huracán</b>                                                 |                        | Participantes relatan la desesperación que sentían en medio del huracán. Sentían miedo y ansiosos por qué no sabían cuando se iba a terminar.                                                                                                                                                                                            |
| 10.a “Dios que esto pare ya”                                                                   |                        |                                                                                                                                                                                                                                                                                                                                          |
| 10.b Falta de comunicación en medio del huracán                                                |                        | Participantes relatan el desespero de no saber que estaba ocurriendo en medio del huracán cuando toda comunicación cesó.                                                                                                                                                                                                                 |

|                                                                                                                         |                                                                      |                                                                                                                                                                                                                                            |
|-------------------------------------------------------------------------------------------------------------------------|----------------------------------------------------------------------|--------------------------------------------------------------------------------------------------------------------------------------------------------------------------------------------------------------------------------------------|
| 10.c Anxiety of people not in Puerto Rico unsure about the                                                              |                                                                      | Participantes relatan que la falta de comunicacion ocasiono desesperacion en aquellos que viven fuera de PR al no saber de sus familiares                                                                                                  |
| 11. Uso de los medios sociales (Fb, twitter, whatsApp).                                                                 |                                                                      | Las personas durante la tormenta trataron de usar las redes sociales para saber que ocurría, pero la falta de conexión imposibilitaba el uso.                                                                                              |
| 12. 12. Relatos sobre las experiencias en los primeros días                                                             |                                                                      | Participantes relatan sus experiencias en los primeros días luego de el huracan                                                                                                                                                            |
| 12.a “Parecia que una bomba callo y secó todo”                                                                          |                                                                      | Participantes relatan su impresion al salir de sus hogares luego de el huracan.                                                                                                                                                            |
| 12.b “Los vecinos se chequearon entre ellos para asegurarse que todos esten bien”                                       |                                                                      | Participantes relatan que tan pronto el huracan ceso, los vecinos se “chequearon” entre ellos para asegurarse que todos estan bien.                                                                                                        |
| 13. Relatos de trauma para la comunidad                                                                                 |                                                                      | Durante y Después del huracán, por ejemplo, inundaciones, incertidumbre por falta de comunicación/electricidad, miedos.                                                                                                                    |
| 14. Experiencias vividas en la comunidad (+)                                                                            |                                                                      |                                                                                                                                                                                                                                            |
| 14.a “Los niños jugaban en la calle y la gente se hablaban entre si”                                                    |                                                                      | Participantes relatan que algo positivo de esta experiencia es poder volver ver a los niños jugando afuera y volver a la union comunitaria donde la gente compartian juntos y comenzaron a conocerse.                                      |
| 14.b Los miembros de la comunidad se unieron para abrir paso y limpiar                                                  |                                                                      | Relatos de como la comunidad se unió para limpiar los escombros                                                                                                                                                                            |
| 14.c Los miembros de la comunidad se unieron para proveer ayuda entre ellos                                             |                                                                      | Relatos sobre la comunidad ayudándose entre sí a buscar alimentos y agua para aquellos que no podían ir.                                                                                                                                   |
| 15. Experiencias vividas en la comunidad (-)                                                                            |                                                                      |                                                                                                                                                                                                                                            |
| 15.a Indifference toward other people’s situations                                                                      |                                                                      | Relatos sobre miembros de la comunidad no ayudandose entre si.<br><br><b>“Nadie con planta se ofreció poner la insulina en la nevera”</b>                                                                                                  |
| 15.b Initially people were neighborly but as things improved, people started to go back to being closed off from others |                                                                      | Participantes relatan que los vecinos se ayudaron entre si al principio, pero luego que las cosas comenzaban a volver a la normalidad volvieron a individualizarse.                                                                        |
| 16. Ayuda/Auxilio                                                                                                       |                                                                      | En general las personas hablaban de como tuvieron que pedir ayuda luego del huracán                                                                                                                                                        |
| 16.a “Nos dejaron solos” después del huracán”                                                                           |                                                                      | ayuda                                                                                                                                                                                                                                      |
| 16.a.1 Help wasn’t coming                                                                                               |                                                                      | Participants expressed that the agencies left them alone. They felt that help from government agencies didn’t arrived.                                                                                                                     |
| 16.b Falta de ayuda entre miembros de la comunidad                                                                      |                                                                      | Express the perception of not receiving help from community members.<br><br>Situaciones donde no se ayudaron entre si                                                                                                                      |
| 16.c Situaciones familiares que se agravaron luego del huracán                                                          |                                                                      | Relatos de problemas en las familias que se agravaron luego del huracan                                                                                                                                                                    |
| 16.d La gente que estaba enferma y no estaba recibiendo la ayuda                                                        |                                                                      | Hubo personas que comentaron sobre como escucharon o tuvieron personas en su comunidad que estaban enferman y la ayuda no les estaba llegando                                                                                              |
| 17. Colapso de servicios básicos                                                                                        |                                                                      |                                                                                                                                                                                                                                            |
| 17.a El colapso de servicios básicos                                                                                    | 17.a1 La falta de electricidad                                       | Relatan como sobrevivieron ante la falta de electricidad y que hacían para llevar a cabo sus tareas diarias.                                                                                                                               |
|                                                                                                                         | 17.a2 No Cash available                                              | “La falta de dinero en efectivo. Los bancos estaban cerrados y luego te limitaban la cantidad de dinero que podías sacar”                                                                                                                  |
|                                                                                                                         | 17.a3 Lines for buying gas, ice                                      | “Las filas para buscar gasolina eran de horas y aveces no llegabas a coger nada”                                                                                                                                                           |
|                                                                                                                         | 17.a4 La falta de alimentos                                          | Participantes relatan la falta de alimentos en lo ssupermercados y las filas largas que se tenían que hacer para poder conseguirlos.                                                                                                       |
|                                                                                                                         | 17.a5 El crimen aumentó                                              | Participantes relatan el alza en crimines en las noches. En especial robos.                                                                                                                                                                |
|                                                                                                                         | 17.a6 La falta de agua                                               | Participantes relatan los estragos antes la falta de agua. Buscaban agua en el rio o en los oasis.                                                                                                                                         |
| 17.b La falta de comunicación. “lo peor fue estar descomunicados, no habia manera de saber de                           | 17b. La falta de comunicación. “lo peor fue estar descomunicados, no | Participants expressed concern due to the lack of communication and desperation because they were not able to reach/communicate with their people.<br><br>Preocupación por no poder comunicarse ni saber las condiciones de sus conocidos. |

|                                                                                                                                                                  |                                                                                     |                                                                                                                                                                                                                                                                                                                                                                                                                                                                                                                                                                                                                                                                                                                           |
|------------------------------------------------------------------------------------------------------------------------------------------------------------------|-------------------------------------------------------------------------------------|---------------------------------------------------------------------------------------------------------------------------------------------------------------------------------------------------------------------------------------------------------------------------------------------------------------------------------------------------------------------------------------------------------------------------------------------------------------------------------------------------------------------------------------------------------------------------------------------------------------------------------------------------------------------------------------------------------------------------|
| nadie"                                                                                                                                                           | 17.b1 El caos generado por no tener comunicación en general                         | Participantes relatan "el caos" que ocurrió por la falta de comunicación y medio informativos.                                                                                                                                                                                                                                                                                                                                                                                                                                                                                                                                                                                                                            |
|                                                                                                                                                                  | 17.b2 Loss of mobile phone service and internet                                     | Relates to the failure of cellphone service.<br>Hace alusión al fallo del servicio telefónico celular.                                                                                                                                                                                                                                                                                                                                                                                                                                                                                                                                                                                                                    |
|                                                                                                                                                                  | 17.b3 Las personas manejaban a otros pueblos para conseguir señal                   | Las personas que tenían que ir a lugares de altura o al área metropolitana buscando señal de celular.                                                                                                                                                                                                                                                                                                                                                                                                                                                                                                                                                                                                                     |
| <b>18. El rol de la "media"</b>                                                                                                                                  |                                                                                     |                                                                                                                                                                                                                                                                                                                                                                                                                                                                                                                                                                                                                                                                                                                           |
| 18.a La gente en los EEUU sabían más de lo que había pasado que los que lo vivieron                                                                              | 18.a La gente en los EEUU sabían más de lo que había pasado que los que lo vivieron | Personas describen como "the media" jugó una función en sus vidas y en los de aquellos que vivían fuera de PR.                                                                                                                                                                                                                                                                                                                                                                                                                                                                                                                                                                                                            |
| 18.b Use of social media (FB, WA) to learn about what was happening.                                                                                             | 18.b Use of social media (FB, WA) to learn about what was happening.                | Este código refleja el uso de los medios sociales para saber que estaba ocurriendo. Ya sea aquellos dentro de PR o fuera de PR buscando familiares.                                                                                                                                                                                                                                                                                                                                                                                                                                                                                                                                                                       |
| <b>19. Incertidumbre de no saber de los familiares dentro de la isla.</b>                                                                                        |                                                                                     |                                                                                                                                                                                                                                                                                                                                                                                                                                                                                                                                                                                                                                                                                                                           |
| <b>20. Falta de acceso a servicios de salud</b>                                                                                                                  |                                                                                     |                                                                                                                                                                                                                                                                                                                                                                                                                                                                                                                                                                                                                                                                                                                           |
| 20.a Condiciones de salud en general se agravaron                                                                                                                |                                                                                     | Mucha gente reportó como los problemas de salud en su comunidad (diabéticos, diálisis) se agravaron por la falta de acceso.                                                                                                                                                                                                                                                                                                                                                                                                                                                                                                                                                                                               |
| 20.b Leptosperosis                                                                                                                                               |                                                                                     | Participantes relatan que las condiciones de salud se agravaron por la falta de medicamentos, electricidad, agua, acceso a hospitales.<br>e.g. manejo de diabetes, alta presión, pacientes en diálisis<br>"Me preocupaba al escuchar los casos de la gente que se estaba muriendo por estar tomando agua. Había escuchado de que el orín del ratón causaba daño"<br>"Ay, yo no me arriesgué, yo no me atreví, porque como estaba lo de la cuestión esta, de que había orines en el agua, (E: ¿de ratón?) De ratón entonces pues, yo sé que a veces la gente, pues, que vende la comida, a veces no tienen buena higiene, y como no había luz, no había agua, pues me daba manía, pues trataba de cocinar lo más posible." |
| 20.c Colapso de servicios hospitalarios                                                                                                                          |                                                                                     | Participantes relatan que la falta de electricidad causó un cierre en la mayoría de los hospitales. Las condiciones detrimentes de los hospitales aumentaron las enfermedades.                                                                                                                                                                                                                                                                                                                                                                                                                                                                                                                                            |
| 20.d Falta de medicamentos en los hospitales                                                                                                                     |                                                                                     | Participantes relatan que los hospitales/farmacias tenían una escasez de suministros.                                                                                                                                                                                                                                                                                                                                                                                                                                                                                                                                                                                                                                     |
| 20.e Escasez de médicos                                                                                                                                          |                                                                                     | Participantes relatan que la deficiencia de médicos en la isla se agravó luego del huracán. No habían médicos suficientes para lidiar con la situación.                                                                                                                                                                                                                                                                                                                                                                                                                                                                                                                                                                   |
| <b>20.f Problemas de Salud Mental</b>                                                                                                                            |                                                                                     |                                                                                                                                                                                                                                                                                                                                                                                                                                                                                                                                                                                                                                                                                                                           |
|                                                                                                                                                                  | 20.f1 Trauma                                                                        | Participantes relatan traumas relacionados al paso del huracán. "La lluvia nos pone nervioso"                                                                                                                                                                                                                                                                                                                                                                                                                                                                                                                                                                                                                             |
|                                                                                                                                                                  | 20.f2 PTSD/triggers                                                                 |                                                                                                                                                                                                                                                                                                                                                                                                                                                                                                                                                                                                                                                                                                                           |
|                                                                                                                                                                  | 20.f3 Problemas para dormir                                                         | Participantes relatan tener dificultades para dormir luego del paso del huracán.                                                                                                                                                                                                                                                                                                                                                                                                                                                                                                                                                                                                                                          |
|                                                                                                                                                                  | 20.f4 Falta de ayuda para lidiar con el post-trauma                                 | Participantes relatan que debido a la limitada comunicación que hubo por meses, existía una falta de ayuda para lidiar con el post-trauma.                                                                                                                                                                                                                                                                                                                                                                                                                                                                                                                                                                                |
|                                                                                                                                                                  | 20.f5 Suicide risks and narratives                                                  | "...y a base de la depresión viene el suicidio, y se escucharon muchos casos en Puerto Rico de personas no solo que se enfermaron, también optaron, la tomaron es decisión de suicidarse, (HF3: del desespero) el desespero que había..."                                                                                                                                                                                                                                                                                                                                                                                                                                                                                 |
|                                                                                                                                                                  | 20.f6 El impacto hacia la salud mental al irse solos a EEUU                         | La salud mental de estar alejado de tu país. "Que dejaste todo allá, que lo perdiste todo. Tus sueños se perdieron"                                                                                                                                                                                                                                                                                                                                                                                                                                                                                                                                                                                                       |
| <b>21. Coping strategies for the aftermath (narrative)</b>                                                                                                       |                                                                                     |                                                                                                                                                                                                                                                                                                                                                                                                                                                                                                                                                                                                                                                                                                                           |
| Relatos sobre las estrategias de afrontamiento que utilizaron luego del huracán.<br>"Lo más cercano a una ayuda mental, fue esto" (refiriéndose a este estudio)" |                                                                                     |                                                                                                                                                                                                                                                                                                                                                                                                                                                                                                                                                                                                                                                                                                                           |
| 21.a Uso del alcohol, y el humor, como un "coping mechanism"                                                                                                     |                                                                                     | Algunos participantes relatan el uso del humor y la fiesta entre vecinos como una estrategia de afrontamiento.                                                                                                                                                                                                                                                                                                                                                                                                                                                                                                                                                                                                            |
| 22.a Carretera bloqueadas (debris)                                                                                                                               |                                                                                     | Relatos sobre carreteras bloqueadas por árboles caídos, postes, tendido eléctrico, etc.                                                                                                                                                                                                                                                                                                                                                                                                                                                                                                                                                                                                                                   |
| 22.b Estructuras perdidas                                                                                                                                        |                                                                                     | Relatos sobre pérdida de hogares o edificios                                                                                                                                                                                                                                                                                                                                                                                                                                                                                                                                                                                                                                                                              |
| 22.c Inundaciones                                                                                                                                                |                                                                                     | Relatos sobre las inundaciones en la comunidad.                                                                                                                                                                                                                                                                                                                                                                                                                                                                                                                                                                                                                                                                           |
| 22.d Pérdida de empleo                                                                                                                                           |                                                                                     | Participantes relatan la pérdida de empleo luego de el huracán María.                                                                                                                                                                                                                                                                                                                                                                                                                                                                                                                                                                                                                                                     |
| 22.e Incremento en la presencia de mosquitos                                                                                                                     |                                                                                     | Las personas no podían dormir tranquilos por la cantidad de mosquitos en el área. Especialmente por la falta de electricidad o techo seguro, las personas estaban más expuestas a estos problemas.                                                                                                                                                                                                                                                                                                                                                                                                                                                                                                                        |

|                                                                                                       |                                  |                                                                                                                                                                                                                                                                                             |
|-------------------------------------------------------------------------------------------------------|----------------------------------|---------------------------------------------------------------------------------------------------------------------------------------------------------------------------------------------------------------------------------------------------------------------------------------------|
| 22.f Incremento en la presencia de roedores                                                           |                                  |                                                                                                                                                                                                                                                                                             |
| 22.g Problemas de agua potable                                                                        | 22.g1 Buscaban agua de los rios  | Participantes relatan la falta de agua potable y que hacian para conseguirla.<br>Participantes relatan que obtenian agua de los rios para el aseo personal.                                                                                                                                 |
|                                                                                                       | 22.g2 Buscaban agua en los oasis | Participantes relatan que obtenian agua de los oasis para uso diario/aseo personal.                                                                                                                                                                                                         |
| <b>23. AID/ RELIEF</b>                                                                                |                                  | Participantes describen los tipos de ayudas que recibieron.                                                                                                                                                                                                                                 |
| 23.a Institutions and large organizations delivering aid and assistance                               |                                  | Participantes describen los tipos de ayudas que recibieron de diferentes organizaciones gubernamentales.                                                                                                                                                                                    |
| 23.b La ayuda venia de familiares viviendo en el exterior                                             |                                  | Participantes relatan que la ayuda que recibían venia de familiares viviendo en el exterior.                                                                                                                                                                                                |
| 23.c Relatos de las personas realizando trabajo voluntario para ayudar dentro y fuera de la comunidad |                                  | Participantes describen sus experiencias haciendo trabajo voluntario.                                                                                                                                                                                                                       |
| 23.d Gratitude of people receiving help                                                               |                                  | Participantes describen como se sintieron cuando les llegaba la ayuda.                                                                                                                                                                                                                      |
| 23.e La gente no se queria comer la comida que estaban dando (MRE's)                                  |                                  | Algunos Participantes no les gustaba la comida que daban de emergencia.                                                                                                                                                                                                                     |
| 23.f La ayuda solo llegaba algunas partes                                                             |                                  | Las personas hablaban de que las ayudas llegaban al centro del pueblo pero aquellas comunidades que quedaban distantes no podian o no llegaban a tiempo para poder recibir las.                                                                                                             |
| 24. Maneras de adaptación ante la falta de servicios                                                  |                                  | Participantes relatan que estrategias usaron para adaptarse ante la falta de servicios basicos.                                                                                                                                                                                             |
| 25. Fé "conexión espiritual"- RELIGIÓN                                                                |                                  | Las personas se aferraron a la religión como una manera para lidiar con las dificultades asociadas a el paso de María.                                                                                                                                                                      |
| 26. Death narrative (story)                                                                           |                                  | Participantes relatan la acumulación de muertos en la morgue, muertes de familiares o vecinos.                                                                                                                                                                                              |
| 26.a Opiniones relacionadas a las muertes                                                             |                                  | Participantes relatan sus opiniones acerca de el tema de las muertes durante/después el Huracan Maria                                                                                                                                                                                       |
| 27. Injury narrative (story)                                                                          |                                  | Relatos sobre heridas/lesiones que ocurrieron luego del paso del huracán.                                                                                                                                                                                                                   |
| 28. Recomendaciones de la comunidad para capacitación en el futuro                                    |                                  | Capacitaciones de manejo de emergencias y ayuda a nivel comunitario para no depender de las agencias gubernamentales. Participantes piensan que se puede "educar" a las personas para la preparación de huracanes desde un nivel comunitario.                                               |
| 29. Lo que se aprendió de este evento                                                                 |                                  | Participantes relatan las cosas que aprendieron desde el paso del huracan.                                                                                                                                                                                                                  |
| 30. Relocalización a EEUU                                                                             |                                  |                                                                                                                                                                                                                                                                                             |
| 30.a Experiencias en general relacionadas con irse de PR                                              |                                  | Participantes relatan cómo se sintieron cuando se fueron de PR y los obstáculos que tuvieron que enfrentar.                                                                                                                                                                                 |
|                                                                                                       |                                  | "Devastador, ese primer mes, esos primeros así fue el primero, los primeros días era—como dijo aquí el caballero—era irreconocible oscuridad. Aunque fuera de día era oscuro porque había mucho sol, pero uno sentía la soledad y la desgracia, se sentía en el aire, lo sentíamos muchos." |
|                                                                                                       |                                  | "experiencia agri dulce porque uno sabía que estaba dejando mucha gente atrás"                                                                                                                                                                                                              |
| 30.a1 Dificultades para conseguir trabajos                                                            |                                  | Participantes relatan lo difícil que se les hizo conseguir trabajo.                                                                                                                                                                                                                         |
| 30.b Relatos de decidir irse para EEUU                                                                |                                  | En general como las personas relataron como fue esa decisión de irse para EEUU                                                                                                                                                                                                              |
| 30.b1 La diferencia de tener a tu familia en EEUU como instrumento de apoyo                           |                                  | Participantes relatan como tener un soporte en EEUU sirvió de apoyo                                                                                                                                                                                                                         |
| 30.b2 El irse sin tener a nadie en EEUU                                                               |                                  | Participantes relatan sus experiencias de tener que irse sin tener a nadie.                                                                                                                                                                                                                 |
| 30.b3 Deseo de mantener una conexión con la patria desde el exterior.                                 |                                  | Este sentimiento de regresar al país pero realmente solo como visita. "Estar aquí y allá"                                                                                                                                                                                                   |
| 30.b4 The dream among diaspora of returning to Puerto Rico                                            |                                  | Participantes relatan sus deseos de volver a la isla.                                                                                                                                                                                                                                       |
| 31. Relatos de vivir en los hoteles                                                                   |                                  | Participantes relatan sus experiencias viviendo en los hoteles.                                                                                                                                                                                                                             |
|                                                                                                       |                                  | "Lo que nos vendieron no era"                                                                                                                                                                                                                                                               |

|                                                                                               |  |                                                                                                                                                                                                           |
|-----------------------------------------------------------------------------------------------|--|-----------------------------------------------------------------------------------------------------------------------------------------------------------------------------------------------------------|
| 31.a El no querer estar los hoteles por que causaba angustia                                  |  | Participantes expresaban que a veces estar en los hoteles era algo parecido a estar en una prision.                                                                                                       |
| 31.b El no tener el espacio para hacer sus cosas                                              |  | Participantes relatan que en los hiteles no habia espacio/privacidad para hacer sus cosas.                                                                                                                |
| 31.c El tener que estar mudandose de hoteles o habitaciones                                   |  | Participantes relatan sus experiencias de tener que estar mudandose constantemente de cuartos.                                                                                                            |
| 31.d Situación de no saber que pasaria cada vez que se anunciaba que FEMA quitaria las ayudas |  | Participantes relatan la angustia de no saber que iban a hacer si quitaban las ayudas.                                                                                                                    |
| 32. Social Disparities                                                                        |  |                                                                                                                                                                                                           |
| 32.a Awareness (or lack of it) of pre-existing disparities in Puerto Rico                     |  | Participantes relatan que el paso del huracan les dio a conocer o destapo los problemas sociales que existen en PR. "María nos enseñó la otra cara de la pobreza en Puerto Rico"                          |
| 33. El racismo y discrimen que se vive en la Florida                                          |  | Participantes relatan los retos que viven en cuanto a la discriminación racial; incluyendo entre latinos mismos.                                                                                          |
| 34. El acceso a la salud en EEUU en comparación con Puerto Rico                               |  | Participantes relatan sus experiencias positivas en el acceso a la salud en EEUU<br>E.g., El no tener que esperar tanto para que te vea un médico                                                         |
| 35. El acceso a la salud en EEUU en comparación con Puerto Rico (-                            |  | Participantes relatan sus experiencias negativas en el acceso a la salud en EEUU.<br>E.g. El costo asociado de ser atendido en los EEUU. Los relatos de ir a sala de urgencia                             |
| 36. Relatos del porque se quieren quedar en EEUU                                              |  | Participantes relatan por que se quieren quedar en EEUU                                                                                                                                                   |
| 36.a Acceso a mas oportunidades de trabajo                                                    |  | La gente hablaba de en comparación con Puerto Rico habian mas oportunidades de trabajo en EEUU. También que se podían mover a otros estados si era necesario.                                             |
| 36.b "Se siente uno mas Seguro"                                                               |  | Las personas relataban que se sentian mas seguros en EEUU que en PUR.                                                                                                                                     |
| 36.c Mejor educación para los niños                                                           |  | Participantes relatan que una de las razones que se quieren quedar en EEUU es porque sus hijos reciben mejor educación.                                                                                   |
| 36.d Wants to return                                                                          |  | Participantes explican sus deseos de volver a PR                                                                                                                                                          |
| 36.e Wants to return, but cannot due to hardship                                              |  | Participantes relatan que desean volver a PR pero no pueden debido a los problemas sociales que enfrenta                                                                                                  |
| 36.f Wants to return, but cannot due to medical reasons                                       |  | Participantes relatan que desean volver a PR pero no pueden debido a los problemas de salud                                                                                                               |
| 37. azones por la cual no consideraron irse del país                                          |  | Participantes describieron su rol en quedarse en la isla luego del huracán. Pensaban que tenían que quedarse para poder "echar la isla para adelante".<br>"Era un deber patriótico"                       |
| 38. Relatos de regresar a PR luego de que pasará la tormenta                                  |  | Participantes relatan sus deseos de regresar a PR/ o como regresaron a PR luego que las cosas comenzaron a mejorar.                                                                                       |
| 39. Reshaping landscape                                                                       |  | Participantes relatan como su entorno cambio luego del paso del huracán.<br><br>Las casas y vecindarios que antes no se veían"                                                                            |
| 40. Issues impacting pregnant women                                                           |  | Eventos que hayan ocurrido con relación a las mujeres embarazadas, ya sea en antes, durante y despues del huracan                                                                                         |
| 41. Issues impacting children                                                                 |  | An infant had a choking episode due to using a different formula than the one he was used too.<br>Niño murió electrocutado al jugar en una caja eléctrica que no se sabía que estaba "viva" (energizada). |
| 42. Impact of hurricanes on Puerto Rican identity (narratives)                                |  | Relatos sobre como el huracan influencio la identidad de los puertorriqueños                                                                                                                              |
| 43. Ao Stressors brought up by participants                                                   |  | Ejemplos de estresores que los participantse describieron en cuanto a los obstaculos luego de el huracan                                                                                                  |
| 43. Age Wisdom (diferencia entre generaciones)                                                |  | Como el haber vivido pasados huracanes/pasadas experiencias (e.g. no celulares) les permitio saber como manejar la situacion comparado con las generaciones mas jovenes.                                  |
| 44. Exemplary narrative (analytic code)                                                       |  | Historias significativas sobre las experiencias durante/despues de el Huracan Maria.                                                                                                                      |
| 45. Medical ecology narrative                                                                 |  | Historias que definan las experiencias durante/despues de el huracán Maria que reflejen el modelo ecológico.                                                                                              |
| 46. Interesting quote (analytic code)                                                         |  | Añadir quotes interesantes o importantes para analisis en el futuro                                                                                                                                       |
